# Supplementary material for: Dirofilaria immitis: Genotyping Randomly Selected European Clinical Samples and USA Laboratory Isolates with Molecular Markers Associated with Macrocyclic Lactone Susceptibility and Resistance
Source: MDPI journal article supplement (doi:10.3390/pathogens11080934), 2022-08-18
Supplement: s1 [file s1]

**Dataset S1:** the allele count and alternative allele frequencies for the 9 SNP molecular markers when compared to the *D. immitis* reference genome nDi.2.2. for the three US laboratory-maintained isolates, WildCat, Berkeley, Georgia II (Tables S1–S3) and the 11 European clinical samples, T2, T3, T4, T9, T10, T11, C1, C2, C4, C5, and M (Tables S4–S14). Data collected from genomic DNA of mf or adult *D. immitis* samples submitted for MiSeq Illumina sequencing and calculated using BVAtools.

Table S1. The allele count and alternative allele frequencies for the 9 SNP molecular markers when compared to the *D. immitis* reference genome nDi.2.2. for the US laboratory-maintained isolate WildCat, originating from West Liberty, Kentucky. Data collected from genomic DNA of *D. immitis* microfilaria submitted for MiSeq Illumina sequencing and calculated using BVAtools.

| Scaffold          | Position | Allele Counts |       |       |       | Allele Frequency |      |      |      | RefBase |
|-------------------|----------|---------------|-------|-------|-------|------------------|------|------|------|---------|
| WildCat           |          | C             | A     | T     | G     | C                | A    | T    | G    |         |
| nDi.2.2.scaf00046 | 76278    | 16914         | 32    | 15786 | 92    | 0.52             | 0    | 0.48 | 0    | T       |
| nDi.2.2.scaf00046 | 22857    | 19932         | 3     | 12818 | 2     | 0.61             | 0    | 0.39 | 0    | T       |
| nDi.2.2.scaf00046 | 222254   | 3             | 15258 | 16    | 17624 | 0                | 0.46 | 0    | 0.54 | A       |
| nDi.2.2.scaf00185 | 10639    | 27            | 8     | 20292 | 5680  | 0                | 0    | 0.78 | 0.22 | T       |
| nDi.2.2.scaf00185 | 62174    | 21126         | 4     | 6727  | 5     | 0.76             | 0    | 0.24 | 0    | C       |
| nDi.2.2.scaf00140 | 30919    | 15936         | 15029 | 13    | 14    | 0.51             | 0.58 | 0    | 0    | C       |
| nDi.2.2.scaf00005 | 662854   | 12156         | 63    | 17757 | 28    | 0.41             | 0    | 0.59 | 0    | T       |
| nDi.2.2.scaf00004 | 79766    | 17491         | 12    | 13709 | 4     | 0.56             | 0    | 0.44 | 0    | T       |
| nDi.2.2.scaf00001 | 466197   | 21            | 15565 | 10737 | 22    | 0                | 0.59 | 0.41 | 0    | A       |

Table S2. The allele count and alternative allele frequencies for the 9 SNP molecular markers when compared to the *D. immitis* reference genome nDi.2.2. for the US laboratory-maintained isolate Berkeley, originating from Berkeley County, South Carolina. Data collected from genomic DNA of *D. immitis* microfilaria submitted for MiSeq Illumina sequencing and calculated using BVAtools.

| Scaffold          | Position | Allele Counts |       |       |     | Allele Frequency |      |      |   | RefBase |
|-------------------|----------|---------------|-------|-------|-----|------------------|------|------|---|---------|
| Berkeley          |          | C             | A     | T     | G   | C                | A    | T    | G |         |
| nDi.2.2.scaf00046 | 76278    | 107           | 12    | 32683 | 147 | 0                | 0.99 | 0    | 0 | T       |
| nDi.2.2.scaf00046 | 22857    | 58            | 8     | 29550 | 4   | 0                | 0    | 1    | 0 | T       |
| nDi.2.2.scaf00046 | 222254   | 13            | 29617 | 22    | 87  | 0                | 1    | 0    | 0 | A       |
| nDi.2.2.scaf00185 | 10639    | 28            | 2     | 17661 | 3   | 0                | 0    | 1    | 0 | T       |
| nDi.2.2.scaf00185 | 62174    | 20241         | 4     | 1648  | 0   | 0.92             | 0    | 0.08 | 0 | C       |
| nDi.2.2.scaf00140 | 30919    | 22101         | 4415  | 18    | 17  | 0.83             | 0.17 | 0    | 0 | C       |
| nDi.2.2.scaf00005 | 662854   | 85            | 59    | 27406 | 54  | 0                | 0    | 1    | 0 | T       |
| nDi.2.2.scaf00004 | 79766    | 3823          | 6     | 21182 | 54  | 0.15             | 0    | 0.85 | 0 | T       |
| nDi.2.2.scaf00001 | 466197   | 9             | 24228 | 23    | 48  | 0                | 1    | 0    | 0 | A       |

Table S3. The allele count and alternative allele frequencies for the 9 SNP molecular markers when compared to the *D. immitis* reference genome nDi.2.2.for the US laboratory-maintained isolate Georgia II, originating from Vidalia, Georgia. Data collected from genomic DNA of *D. immitis* microfilaria submitted for MiSeq Illumina sequencing and calculated using BVAtools.

| Scaffold          | Position | Allele Counts |       |       |      | Allele Frequency |      |      |      | RefBase |
|-------------------|----------|---------------|-------|-------|------|------------------|------|------|------|---------|
| Georgia II        |          | C             | A     | T     | G    | C                | A    | T    | G    |         |
| nDi.2.2.scaf00046 | 76278    | 1887          | 12    | 30690 | 159  | 0.06             | 0    | 0.94 | 0    | T       |
| nDi.2.2.scaf00046 | 22857    | 1680          | 5     | 29397 | 9    | 0.05             | 0    | 0.95 | 0    | T       |
| nDi.2.2.scaf00046 | 222254   | 8             | 29202 | 25    | 1726 | 0                | 0.94 | 0    | 0.06 | A       |
| nDi.2.2.scaf00185 | 10639    | 40            | 6     | 20972 | 2    | 0                | 0    | 1    | 0    | T       |
| nDi.2.2.scaf00185 | 62174    | 20971         | 6     | 3486  | 4    | 0.86             | 0    | 0.14 | 0    | C       |
| nDi.2.2.scaf00140 | 30919    | 27649         | 23    | 19    | 3    | 1                | 0    | 0    | 0    | C       |
| nDi.2.2.scaf00005 | 662854   | 79            | 58    | 27554 | 41   | 0                | 0    | 0.99 | 0    | T       |
| nDi.2.2.scaf00004 | 79766    | 1615          | 13    | 26037 | 6    | 0.06             | 0    | 0.94 | 0    | T       |
| nDi.2.2.scaf00001 | 466197   | 5             | 23841 | 19    | 57   | 0                | 1    | 0    | 0    | A       |

Table S4. The allele count and alternative allele frequencies for the 9 SNP molecular markers when compared to the *D. immitis* reference genome nDi.2.2.for European clinical sample T2, originating from the Lombardy Region, Italy. Data collected from genomic DNA of *D. immitis* adult female submitted for MiSeq Illumina sequencing and calculated using BVAtools.

| Scaffold          | Position | Allele Counts |       |       |     | Allele Frequency |   |      |      | RefBase |
|-------------------|----------|---------------|-------|-------|-----|------------------|---|------|------|---------|
| T2                |          | C             | A     | T     | G   | C                | A | T    | G    |         |
| nDi.2.2.scaf00046 | 76278    | 80            | 31    | 27479 | 147 | 0                | 0 | 0.99 | 0.01 | T       |
| nDi.2.2.scaf00046 | 22857    | 54            | 16    | 27125 | 3   | 0                | 0 | 1    | 0    | T       |
| nDi.2.2.scaf00046 | 222254   | 16            | 26194 | 25    | 77  | 0                | 1 | 0    | 0    | A       |
| nDi.2.2.scaf00185 | 10639    | 29            | 13    | 16373 | 2   | 0                | 0 | 1    | 0    | T       |
| nDi.2.2.scaf00185 | 62174    | 19972         | 6     | 18    | 3   | 1                | 0 | 0    | 0    | C       |
| nDi.2.2.scaf00140 | 30919    | 25084         | 16    | 21    | 3   | 1                | 0 | 0    | 0    | C       |
| nDi.2.2.scaf00005 | 662854   | 68            | 72    | 24346 | 41  | 0                | 0 | 0.99 | 0    | T       |
| nDi.2.2.scaf00004 | 79766    | 85            | 14    | 22694 | 4   | 0                | 0 | 1    | 0    | T       |
| nDi.2.2.scaf00001 | 466197   | 13            | 21079 | 9     | 59  | 0                | 1 | 0    | 0    | A       |

Table S5. The allele count and alternative allele frequencies for the 9 SNP molecular markers when compared to the *D. immitis* reference genome nDi.2.2.for European clinical sample T3, originating from the Lombardy Region, Italy. Data collected from genomic DNA of *D. immitis* adult female submitted for MiSeq Illumina sequencing and calculated using BVAtools.

| Scaffold          | Position | Allele Counts |       |       |     | Allele Frequency |   |      | RefBase |   |
|-------------------|----------|---------------|-------|-------|-----|------------------|---|------|---------|---|
| T3                |          | C             | A     | T     | G   | C                | A | T    | G       |   |
| nDi.2.2.scaf00046 | 76278    | 114           | 15    | 26392 | 127 | 0                | 0 | 0.99 | 0       | T |
| nDi.2.2.scaf00046 | 22857    | 73            | 14    | 27048 | 2   | 0                | 0 | 1    | 0       | T |
| nDi.2.2.scaf00046 | 222254   | 10            | 23364 | 14    | 82  | 0                | 1 | 0    | 0       | A |
| nDi.2.2.scaf00185 | 10639    | 18            | 10    | 11827 | 5   | 0                | 0 | 1    | 0       | T |
| nDi.2.2.scaf00185 | 62174    | 18757         | 5     | 10    | 3   | 1                | 0 | 0    | 0       | C |
| nDi.2.2.scaf00140 | 30919    | 21713         | 10    | 18    | 5   | 1                | 0 | 0    | 0       | C |
| nDi.2.2.scaf00005 | 662854   | 95            | 44    | 25257 | 54  | 0                | 0 | 0.99 | 0       | T |
| nDi.2.2.scaf00004 | 79766    | 75            | 4     | 18803 | 4   | 0                | 0 | 1    | 0       | T |
| nDi.2.2.scaf00001 | 466197   | 2             | 22252 | 21    | 55  | 0                | 1 | 0    | 0       | A |

Table S6. The allele count and alternative allele frequencies for the 9 SNP molecular markers when compared to the *D. immitis* reference genome nDi.2.2.for European clinical sample T4, originating from the Lombardy Region, Italy. Data collected from genomic DNA of *D. immitis* adult female submitted for MiSeq Illumina sequencing and calculated using BVAtools.

| Scaffold          | Position | Allele Counts |       |       |     | Allele Frequency |   |      | RefBase |   |
|-------------------|----------|---------------|-------|-------|-----|------------------|---|------|---------|---|
| T4                |          | C             | A     | T     | G   | C                | A | T    | G       |   |
| nDi.2.2.scaf00046 | 76278    | 80            | 14    | 29237 | 125 | 0                | 0 | 0.99 | 0       | T |
| nDi.2.2.scaf00046 | 22857    | 79            | 3     | 31371 | 8   | 0                | 0 | 1    | 0       | T |
| nDi.2.2.scaf00046 | 222254   | 3             | 28493 | 30    | 88  | 0                | 1 | 0    | 0       | A |
| nDi.2.2.scaf00185 | 10639    | 27            | 4     | 13618 | 7   | 0                | 0 | 1    | 0       | T |
| nDi.2.2.scaf00185 | 62174    | 21689         | 7     | 53    | 0   | 1                | 0 | 0    | 0       | C |
| nDi.2.2.scaf00140 | 30919    | 25533         | 30    | 14    | 2   | 1                | 0 | 0    | 0       | C |
| nDi.2.2.scaf00005 | 662854   | 88            | 70    | 27343 | 40  | 0                | 0 | 0.99 | 0       | T |
| nDi.2.2.scaf00004 | 79766    | 74            | 6     | 22054 | 2   | 0                | 0 | 1    | 0       | T |
| nDi.2.2.scaf00001 | 466197   | 13            | 23673 | 32    | 47  | 0                | 1 | 0    | 0       | A |

Table S7. The allele count and alternative allele frequencies for the 9 SNP molecular markers when compared to the *D. immitis* reference genome nDi.2.2.for European clinical sample T9, originating from Hungary. Data collected from genomic DNA of *D. immitis* adult female submitted for MiSeq Illumina sequencing and calculated using BVAtools.

| Scaffold          | Position | Allele Counts |       |       |     | Allele Frequency |      |      | RefBase |   |
|-------------------|----------|---------------|-------|-------|-----|------------------|------|------|---------|---|
| T9                |          | C             | A     | T     | G   | C                | A    | T    | G       |   |
| nDi.2.2.scaf00046 | 76278    | 100           | 11    | 26435 | 127 | 0                | 0    | 0.99 | 0       | T |
| nDi.2.2.scaf00046 | 22857    | 75            | 12    | 31584 | 3   | 0                | 0    | 1    | 0       | T |
| nDi.2.2.scaf00046 | 222254   | 16            | 26722 | 17    | 102 | 0                | 0.99 | 0    | 0       | A |
| nDi.2.2.scaf00185 | 10639    | 18            | 0     | 10045 | 1   | 0                | 0    | 1    | 0       | T |
| nDi.2.2.scaf00185 | 62174    | 20368         | 7     | 11    | 0   | 1                | 0    | 0    | 0       | C |
| nDi.2.2.scaf00140 | 30919    | 22804         | 14    | 8     | 4   | 1                | 0    | 0    | 0       | C |
| nDi.2.2.scaf00005 | 662854   | 87            | 63    | 27962 | 51  | 0                | 0    | 0.99 | 0       | T |
| nDi.2.2.scaf00004 | 79766    | 128           | 8     | 20933 | 5   | 0.01             | 0    | 0.99 | 0       | T |
| nDi.2.2.scaf00001 | 466197   | 7             | 24316 | 18    | 31  | 0                | 1    | 0    | 0       | A |

Table S8. The allele count and alternative allele frequencies for the 9 SNP molecular markers when compared to the *D. immitis* reference genome nDi.2.2.for European clinical sample T10, originating from Hungary. Data collected from genomic DNA of *D. immitis* adult female submitted for MiSeq Illumina sequencing and calculated using BVAtools.

| Scaffold          | Position | Allele Counts |       |       |     | Allele Frequency |      |      | RefBase |   |
|-------------------|----------|---------------|-------|-------|-----|------------------|------|------|---------|---|
| T10               |          | C             | A     | T     | G   | C                | A    | T    | G       |   |
| nDi.2.2.scaf00046 | 76278    | 67            | 12    | 22664 | 123 | 0                | 0    | 0.99 | 0.01    | T |
| nDi.2.2.scaf00046 | 22857    | 90            | 7     | 27415 | 2   | 0                | 0    | 1    | 0       | T |
| nDi.2.2.scaf00046 | 222254   | 4             | 22890 | 27    | 110 | 0                | 0.99 | 0    | 0       | A |
| nDi.2.2.scaf00185 | 10639    | 18            | 5     | 10640 | 2   | 0                | 0    | 1    | 0       | T |
| nDi.2.2.scaf00185 | 62174    | 18442         | 2     | 23    | 2   | 1                | 0    | 0    | 0       | C |
| nDi.2.2.scaf00140 | 30919    | 21654         | 23    | 13    | 2   | 1                | 0    | 0    | 0       | C |
| nDi.2.2.scaf00005 | 662854   | 86            | 53    | 22887 | 45  | 0                | 0    | 0.99 | 0       | T |
| nDi.2.2.scaf00004 | 79766    | 50            | 15    | 17788 | 6   | 0                | 0    | 1    | 0       | T |
| nDi.2.2.scaf00001 | 466197   | 4             | 19642 | 9     | 46  | 0                | 1    | 0    | 0       | A |

Table S9. The allele count and alternative allele frequencies for the 9 SNP molecular markers when compared to the *D. immitis* reference genome nDi.2.2.for European clinical sample T11, originating from Hungary. Data collected from genomic DNA of *D. immitis* adult female submitted for MiSeq Illumina sequencing and calculated using BVAtools.

| Scaffold          | Position | Allele Counts |       |       |     | Allele Frequency |   |      | RefBase |   |
|-------------------|----------|---------------|-------|-------|-----|------------------|---|------|---------|---|
| T11               |          | C             | A     | T     | G   | C                | A | T    | G       |   |
| nDi.2.2.scaf00046 | 76278    | 56            | 3     | 22645 | 111 | 0                | 0 | 0.99 | 0       | T |
| nDi.2.2.scaf00046 | 22857    | 30            | 1     | 25528 | 4   | 0                | 0 | 1    | 0       | T |
| nDi.2.2.scaf00046 | 22857    | 30            | 1     | 25528 | 4   | 0                | 0 | 1    | 0       | T |
| nDi.2.2.scaf00185 | 10639    | 27            | 1     | 13540 | 1   | 0                | 0 | 1    | 0       | T |
| nDi.2.2.scaf00185 | 62174    | 18542         | 3     | 15    | 1   | 1                | 0 | 0    | 0       | C |
| nDi.2.2.scaf00140 | 30919    | 18340         | 11    | 15    | 1   | 1                | 0 | 0    | 0       | C |
| nDi.2.2.scaf00005 | 662854   | 50            | 51    | 23208 | 35  | 0                | 0 | 0.99 | 0       | T |
| nDi.2.2.scaf00004 | 79766    | 45            | 2     | 18282 | 1   | 0                | 0 | 1    | 0       | T |
| nDi.2.2.scaf00001 | 466197   | 6             | 19183 | 11    | 31  | 0                | 1 | 0    | 0       | A |

Table S10. The allele count and alternative allele frequencies for the 9 SNP molecular markers when compared to the *D. immitis* reference genome nDi.2.2.for European clinical sample C1, originating from the Canary Islands, Spain. Data collected from genomic DNA of *D. immitis* microfilaria submitted for MiSeq Illumina sequencing and calculated using BVAtools.

| Scaffold          | Position | Allele Counts |       |       |     | Allele Frequency |      |      | RefBase |   |
|-------------------|----------|---------------|-------|-------|-----|------------------|------|------|---------|---|
| C1                |          | C             | A     | T     | G   | C                | A    | T    | G       |   |
| nDi.2.2.scaf00046 | 76278    | 80            | 9     | 20269 | 94  | 0                | 0    | 0.99 | 0       | T |
| nDi.2.2.scaf00046 | 22857    | 63            | 15    | 21227 | 4   | 0                | 0    | 1    | 0       | T |
| nDi.2.2.scaf00046 | 222254   | 6             | 19732 | 32    | 102 | 0                | 0.99 | 0    | 0       | A |
| nDi.2.2.scaf00185 | 10639    | 12            | 7     | 9602  | 3   | 0                | 0    | 1    | 0       | T |
| nDi.2.2.scaf00185 | 62174    | 15604         | 5     | 10    | 0   | 1                | 0    | 0    | 0       | C |
| nDi.2.2.scaf00140 | 30919    | 19144         | 13    | 9     | 4   | 1                | 0    | 0    | 0       | C |
| nDi.2.2.scaf00005 | 662854   | 47            | 43    | 20596 | 35  | 0                | 0    | 0.99 | 0       | T |
| nDi.2.2.scaf00004 | 79766    | 59            | 8     | 16062 | 1   | 0                | 0    | 1    | 0       | T |
| nDi.2.2.scaf00001 | 466197   | 3             | 17385 | 11    | 50  | 0                | 1    | 0    | 0       | A |

Table S11. The allele count and alternative allele frequencies for the 9 SNP molecular markers when compared to the *D. immitis* reference genome nDi.2.2.for European clinical sample C2, originating from the Canary Islands, Spain. Data collected from genomic DNA of *D. immitis* microfilaria submitted for MiSeq Illumina sequencing and calculated using BVAtools.

| Scaffold          | Position | Allele Counts |       |       |     | Allele Frequency |      |      | RefBase |   |
|-------------------|----------|---------------|-------|-------|-----|------------------|------|------|---------|---|
| C2                |          | C             | A     | T     | G   | C                | A    | T    | G       |   |
| nDi.2.2.scaf00046 | 76278    | 75            | 17    | 25099 | 122 | 0                | 0    | 0.99 | 0       | T |
| nDi.2.2.scaf00046 | 22857    | 71            | 10    | 25172 | 0   | 0                | 0    | 1    | 0       | T |
| nDi.2.2.scaf00046 | 222254   | 7             | 23996 | 29    | 983 | 0                | 0.96 | 0    | 0.04    | A |
| nDi.2.2.scaf00185 | 10639    | 28            | 10    | 14837 | 9   | 0                | 0    | 1    | 0       | T |
| nDi.2.2.scaf00185 | 62174    | 193170        | 22    | 0     | 0   | 1                | 0    | 0    | 0       | C |
| nDi.2.2.scaf00140 | 30919    | 22151         | 28    | 14    | 4   | 1                | 0    | 0    | 0       | C |
| nDi.2.2.scaf00005 | 662854   | 64            | 71    | 22511 | 39  | 0                | 0    | 0.99 | 0       | T |
| nDi.2.2.scaf00004 | 79766    | 904           | 1     | 18802 | 5   | 0.05             | 0    | 0.95 | 0       | T |
| nDi.2.2.scaf00001 | 466197   | 2             | 19345 | 12    | 54  | 0                | 1    | 0    | 0       | A |

Table S12. The allele count and alternative allele frequencies for the 9 SNP molecular markers when compared to the *D. immitis* reference genome nDi.2.2.for European clinical sample C4, originating from the Canary Islands, Spain. Data collected from genomic DNA of *D. immitis* microfilaria submitted for MiSeq Illumina sequencing and calculated using BVAtools.

| Scaffold          | Position | Allele Counts |      |       |    | Allele Frequency |      |      | RefBase |   |
|-------------------|----------|---------------|------|-------|----|------------------|------|------|---------|---|
| C4                |          | C             | A    | T     | G  | C                | A    | T    | G       |   |
| nDi.2.2.scaf00046 | 76278    | 36            | 8    | 7959  | 47 | 0                | 0    | 0.99 | 0.01    | T |
| nDi.2.2.scaf00046 | 22857    | 29            | 0    | 12454 | 5  | 0                | 0    | 1    | 0       | T |
| nDi.2.2.scaf00046 | 222254   | 0             | 8640 | 9     | 37 | 0                | 0.99 | 0    | 0       | A |
| nDi.2.2.scaf00185 | 10639    | 8             | 2    | 2232  | 2  | 0                | 0    | 0.99 | 0       | T |
| nDi.2.2.scaf00185 | 62174    | 6922          | 4    | 16    | 0  | 1                | 0    | 0    | 0       | C |
| nDi.2.2.scaf00140 | 30919    | 9696          | 14   | 6     | 2  | 1                | 0    | 0    | 0       | C |
| nDi.2.2.scaf00005 | 662854   | 59            | 25   | 12980 | 33 | 0                | 0    | 0.99 | 0       | T |
| nDi.2.2.scaf00004 | 79766    | 21            | 5    | 4362  | 1  | 0                | 0    | 0.99 | 0       | T |
| nDi.2.2.scaf00001 | 466197   | 3             | 9370 | 5     | 23 | 0                | 1    | 0    | 0       | A |

Table S13. The allele count and alternative allele frequencies for the 9 SNP molecular markers when compared to the *D. immitis* reference genome nDi.2.2.for European clinical sample C5, originating from the Canary Islands, Spain. Data collected from genomic DNA of *D. immitis* microfilaria submitted for MiSeq Illumina sequencing and calculated using BVAtools.

| Scaffold          | Position | Allele Counts |       |       |      | Allele Frequency |      |      | RefBase |   |
|-------------------|----------|---------------|-------|-------|------|------------------|------|------|---------|---|
| C5                |          | C             | A     | T     | G    | C                | A    | T    | G       |   |
| nDi.2.2.scaf00046 | 76278    | 49            | 10    | 19675 | 80   | 0                | 0    | 0.99 | 0       | T |
| nDi.2.2.scaf00046 | 22857    | 27            | 4     | 19946 | 3    | 0                | 0    | 1    | 0       | T |
| nDi.2.2.scaf00046 | 222254   | 4             | 18179 | 17    | 1576 | 0                | 0.92 | 0    | 0.08    | A |
| nDi.2.2.scaf00185 | 10639    | 45            | 7     | 14279 | 10   | 0                | 0    | 1    | 0       | T |
| nDi.2.2.scaf00185 | 62174    | 15735         | 0     | 16    | 1    | 1                | 0    | 0    | 0       | C |
| nDi.2.2.scaf00140 | 30919    | 18567         | 15    | 19    | 3    | 1                | 0    | 0    | 0       | C |
| nDi.2.2.scaf00005 | 662854   | 51            | 47    | 18298 | 25   | 0                | 0    | 0.99 | 0       | T |
| nDi.2.2.scaf00004 | 79766    | 1351          | 2     | 16119 | 5    | 0.08             | 0    | 0.92 | 0       | T |
| nDi.2.2.scaf00001 | 466197   | 3             | 15783 | 13    | 31   | 0                | 1    | 0    | 0       | A |

Table S14. The allele count and alternative allele frequencies for the 9 SNP molecular markers when compared to the *D. immitis* reference genome nDi.2.2.for European clinical sample M, from Huelva, Andalusia, Spain , adopted and relocated to Savona, Italy. Data collected from genomic DNA of *D. immitis* microfilaria submitted for MiSeq Illumina sequencing and calculated using BVAtools.

| Scaffold          | Position | Allele Counts |       |       |     | Allele Frequency |      |      | RefBase |   |
|-------------------|----------|---------------|-------|-------|-----|------------------|------|------|---------|---|
| M                 |          | C             | A     | T     | G   | C                | A    | T    | G       |   |
| nDi.2.2.scaf00046 | 76278    | 116           | 17    | 27101 | 119 | 0                | 0    | 0.99 | 0       | T |
| nDi.2.2.scaf00046 | 22857    | 61            | 8     | 28136 | 10  | 0                | 0    | 1    | 0       | T |
| nDi.2.2.scaf00046 | 222254   | 8             | 25508 | 40    | 105 | 0                | 0.99 | 0    | 0       | A |
| nDi.2.2.scaf00185 | 10639    | 28            | 5     | 13581 | 5   | 0                | 0    | 1    | 0       | T |
| nDi.2.2.scaf00185 | 62174    | 20278         | 4     | 18    | 1   | 1                | 0    | 0    | 0       | C |
| nDi.2.2.scaf00140 | 30919    | 23777         | 15    | 27    | 0   | 1                | 0    | 0    | 0       | C |
| nDi.2.2.scaf00005 | 662854   | 72            | 45    | 26547 | 65  | 0                | 0    | 0.99 | 0       | T |
| nDi.2.2.scaf00004 | 79766    | 118           | 5     | 20352 | 4   | 0.01             | 0    | 0.99 | 0       | T |
| nDi.2.2.scaf00001 | 466197   | 5             | 22744 | 18    | 79  | 0                | 1    | 0    | 0       | A |
