# Supplementary material for: Dirofilaria immitis: Genotyping Randomly Selected European Clinical Samples and USA Laboratory Isolates with Molecular Markers Associated with Macrocyclic Lactone Susceptibility and Resistance
Source: MDPI journal article supplement (doi:10.3390/pathogens11080934), 2022-08-18
Supplement: s1 [file s1]

Table S15 SNP ID position and primer sequences [11]

| ID    | Scaffold          | Position | Primer Name & Sequence                                                                                                               |
|-------|-------------------|----------|--------------------------------------------------------------------------------------------------------------------------------------|
| SNP 1 | nDi.2.2.scaf00001 | 466197   | scaf00001-466197-CS1F ACACTGACGACATGGTTCTACATTCTATCGAAAACCTTCCAG<br>scaf00001-466197-CS2R TACGGTAGCAGAGACTTGGTCTAGGTTGCAAAAGTTGCAATG |
| SNP 2 | nDi.2.2.scaf00004 | 79766    | scaf00004-79766-CS1F ACACTGACGACATGGTTCTACACGTGACTAAAAGAATAGTG<br>scaf00004-79766-CS2R TACGGTAGCAGAGACTTGGTCTCAATTTAGGGATATGACACAG   |
| SNP 3 | nDi.2.2.scaf00005 | 662854   | scaf00005-662854-CS1F ACACTGACGACATGGTTCTACAGTTATTTGCACTACTCTCCC<br>scaf00005-662854-CS2R TACGGTAGCAGAGACTTGGTCTTGGCGTACTGATCACATTGG |
| SNP 4 | nDi.2.2.scaf00046 | 22857    | scaf00046-22857-CS1F ACACTGACGACATGGTTCTACACGAGGTAAAGCACACAGAAG<br>scaf00046-22857-CS2R TACGGTAGCAGAGACTTGGTCTCAACAAAATGCCGCAGATGG   |
| SNP 5 | nDi.2.2.scaf00046 | 76278    | scaf00046-76278-CS1F ACACTGACGACATGGTTCTACAGGCCAATAAATAAAGGCTA<br>scaf00046-76278-CS2R TACGGTAGCAGAGACTTGGTCTGTTTTCTGGAATTATCAGAC    |
| SNP 6 | nDi.2.2.scaf00046 | 222254   | scaf00046-222254-CS1F ACACTGACGACATGGTTCTACACATCGTTGTCAACTTCCTGC<br>scaf00046-222254-CS2R TACGGTAGCAGAGACTTGGTCTGAAATTTGAAAATGGGTACT |
| SNP 7 | nDi.2.2.scaf00140 | 30919    | scaf00140-30919-CS1F ACACTGACGACATGGTTCTACACGAAGAAGAAACTTTTCGGG<br>scaf00140-30919-CS2R TACGGTAGCAGAGACTTGGTCTGTACAATTAATTGCTGTTTCGC |
| SNP 8 | nDi.2.2.scaf00185 | 10639    | scaf00185-10639-CS1F ACACTGACGACATGGTTCTACAACGCAGGAAAGCTTTAATGG<br>scaf00185-10639-CS2R TACGGTAGCAGAGACTTGGTCTATCATCATTTTATCAATTCC   |
| SNP 9 | nDi.2.2.scaf00185 | 62174    | scaf00185-62174-CS1F ACACTGACGACATGGTTCTACATCGATCATTTAGTAACAACG<br>scaf00185-62174-CS2R TACGGTAGCAGAGACTTGGTCTTTGCGTTACAGCGCCAAATC   |
